## **Non-invasive study of *Octopus vulgaris* arm morphology using ultrasound**

Laura Margheri, Giovanna Ponte, Barbara Mazzolai, Cecilia Laschi and Graziano Fiorito

10.1242/jeb.067454

There was an error published in *J. Exp. Biol.* **214**, 3727-3731.

The funding information was incomplete. It should have read:

This work was supported by the European Commission (ICT-FET OCTOPUS Integrating Project, contract no. 231608) and by Istituto Banco di Napoli, Fondazione (Italy).

We apologise to authors and readers for any inconvenience this error may have caused.
